# Supplementary material
Source: MDPI journal article supplement (https://www.mdpi.com/2075-163X/11/12/1386)
Supplement: s1 [file s1 › minerals-1392437-supplementary.pdf]

# Supplementary information for

## *In situ* EXAFS study of Sr adsorption on TiO<sub>2</sub>(110) under high ionic strength wastewater conditions

*Arjen van Veelen<sup>±§\*</sup>, Paul C. M. Francisco<sup>†</sup>, Nicholas P. Edwards<sup>±</sup>, J. Frederick W. Mosselmans<sup>‡</sup>,  
Tsutomu Sato<sup>†</sup> and Roy A. Wogelius<sup>±\*</sup>*

<sup>±</sup>Williamson Research Centre, School of Earth and Environmental Sciences, University of Manchester, Oxford Road, Manchester, M13 9PL, United Kingdom

<sup>§</sup>Material Science and Technology Division, Los Alamos National Laboratory, Los Alamos, NM 87545, United States

<sup>†</sup>Laboratory of Environmental Geology, Faculty of Engineering, Hokkaido University, Kita 13 Nishi 8, Kita-ku, 060-8628 Sapporo, Japan

<sup>‡</sup>Diamond Light Source, Harwell Science and Innovation Campus, Fermi Avenue, Didcot, OX11 0DE, United Kingdom

| TABLE OF CONTENT                                                                                   | page |
|----------------------------------------------------------------------------------------------------|------|
| Table S1. Full experimental conditions.                                                            | 2    |
| Figure S1. <i>In situ</i> flow-cell setup at the beamline.                                         | 3    |
| Table S2. Batch bulk adsorption and synchrotron <i>in situ</i> adsorption fitting results          | 4    |
| Figure S2. Sr species modeling using PHREEQC                                                       | 5    |
| Table S3. X-ray reflectivity fitting results of adsorbed Sr on rutile(110)                         | 6    |
| Figure S3. Grazing incidence XRD pattern of SrCO <sub>3</sub> adsorbed to the rutile(110) surface. | 7    |
| Figure S4. Ti 2p and Sr 3d measured XPS spectra.                                                   | 8    |
| Figure S5. O 1s and C 1s measured XPS spectra.                                                     | 9    |
| Table S4. XPS fitting results of Sr, O, Ti and C under the four conditions.                        | 10   |
| Figure S6. Cl 2s measured XPS spectra.                                                             | 11   |
| SS1. EXAFS fitting routine Sr EXAFS                                                                | 12   |
| SS2. Polarization dependence <i>ex situ</i> SrCO <sub>3</sub>                                      | 14   |

Table S1. Full experimental conditions of all experiments performed.

| Experiment                            | m<br>(g) | V<br>(mL) | Surface area<br>(m <sup>2</sup> ) | [Sr]<br>(ppm)                   | Time<br>(h)                      | [CO <sub>3</sub> ]<br>(mM)         | [Cl]<br>(M)         | ads. Sr<br>(μg) |
|---------------------------------------|----------|-----------|-----------------------------------|---------------------------------|----------------------------------|------------------------------------|---------------------|-----------------|
| <b><i>Powder SrCl<sub>2</sub></i></b> |          |           |                                   |                                 |                                  |                                    |                     |                 |
| adsorption isotherm                   | 0.5      | 20        | 18.395                            | 0, 0.5, 50, 100, 250, 500, 1000 | 48                               |                                    | 0.25                |                 |
| adsorption rate                       | 0.5      | 20        | 18.395                            | 100                             | 0, 0.25, 0.5, 1, 2, 4, 8, 24, 48 |                                    | 0.25                |                 |
| carbonate effect                      | 0.5      | 20        | 18.395                            | 100                             | 24                               | 0, 0.05, 0.1, 0.25, 0.5, 1, 2.5, 5 | 0.25                |                 |
| <b><i>Powder SrCO<sub>3</sub></i></b> |          |           |                                   |                                 |                                  |                                    |                     |                 |
| adsorption rate                       | 0.25     | 20        | 9.198                             | 50                              | 0, 0.25, 0.5, 1, 2, 4, 8, 24, 48 | 0.6                                | 0.25                |                 |
| chlorine effect                       | 0.25     | 20        | 9.198                             | 50                              | 24                               | 0.6                                | 0, 0.05, 0.15, 0.25 |                 |
| <b><i>EXAFS rutile(110)</i></b>       |          |           |                                   |                                 |                                  |                                    |                     |                 |
| <i>Ex situ</i> SrCl <sub>2</sub>      |          | 5         | 2x10 <sup>-4</sup>                | 500                             | 48                               |                                    | 0.25                | 251.35          |
| <i>Ex situ</i> SrCO <sub>3</sub>      |          | 5         | 2x10 <sup>-4</sup>                | 50                              | 48                               |                                    | 0.25                | 196.35          |
| <i>In situ</i> SrCl <sub>2</sub>      |          | ~7.9      | 1x10 <sup>-4</sup>                | 500                             | 3.7                              |                                    | 0.25                | 43.24           |

# *In-situ* flow-cell setup

Cell loaded with  
dummy crystal

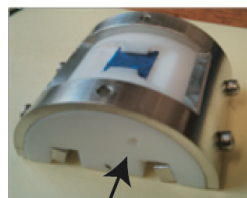

Fluid inlet

Aluminium  
spill tray

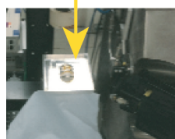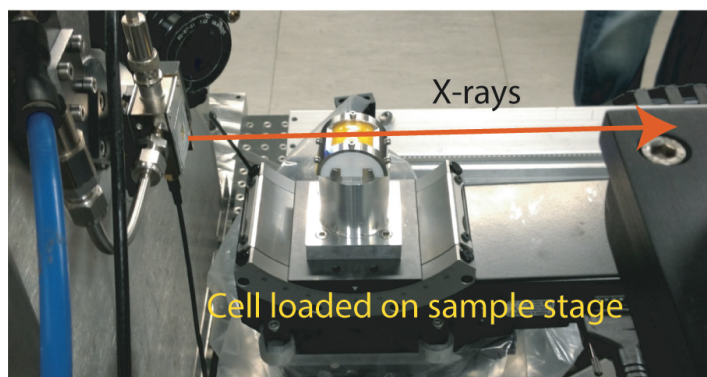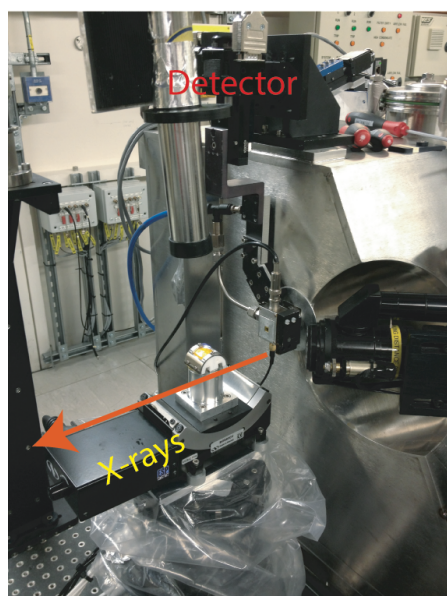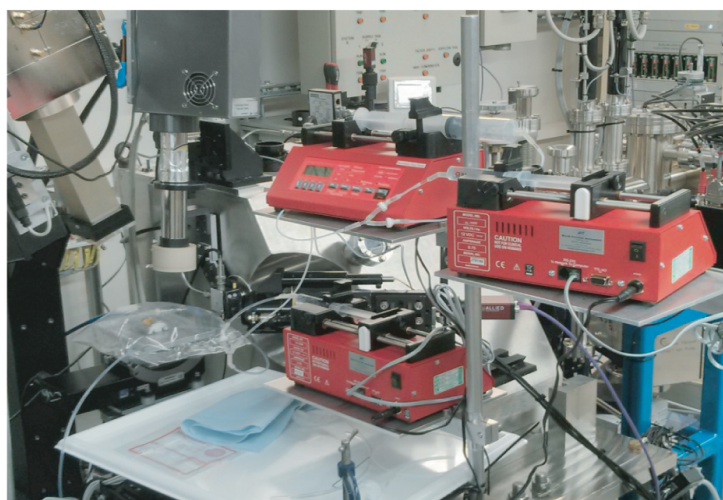

Syringe pump connected to flow cell via teflon  
tubing

Figure S1. *In situ* flow-cell setup at the beamline I18 at Diamond Light Source.

Table S2. Batch bulk adsorption and synchrotron *in-situ* adsorption experimental fitting results.

| Experiment                       | Fitting model | Langmuir       | Adsorption rate |           |                 |       |
|----------------------------------|---------------|----------------|-----------------|-----------|-----------------|-------|
|                                  |               |                | 1st order       | 2nd order |                 |       |
| <b>Powder SrCl2</b>              |               |                |                 |           |                 |       |
| Adsorption isotherm              |               | K <sub>L</sub> | 0.0074          |           |                 |       |
|                                  |               | q <sub>m</sub> | 2.172           |           |                 |       |
|                                  |               | r <sup>2</sup> | 0.995           |           |                 |       |
| Adsorption rate                  |               |                | K               | 0.052     | k <sub>2</sub>  | 0.14  |
|                                  |               |                | q <sub>e</sub>  | 0.543     | q <sub>e2</sub> | 0.572 |
|                                  |               |                | r <sup>2</sup>  | 0.987     | r <sup>2</sup>  | 0.988 |
| Carbonate effect                 |               | K <sub>L</sub> | 0.342           |           |                 |       |
|                                  |               | q <sub>m</sub> | 3.148           |           |                 |       |
|                                  |               | r <sup>2</sup> | 0.994           |           |                 |       |
| <b>Powder SrCO3</b>              |               |                |                 |           |                 |       |
| Adsorption rate                  |               |                | K               | 0.06      | k <sub>2</sub>  | 0.08  |
|                                  |               |                | q <sub>e</sub>  | 1.359     | q <sub>e2</sub> | 1.408 |
|                                  |               |                | r <sup>2</sup>  | 0.977     | r <sup>2</sup>  | 0.943 |
| Chlorine effect                  |               | K <sub>L</sub> | 0.034           |           |                 |       |
|                                  |               | q <sub>m</sub> | 1.499           |           |                 |       |
|                                  |               | r <sup>2</sup> | 0.757           |           |                 |       |
| <b>EXAFS in situ rutile(110)</b> |               |                |                 |           |                 |       |
| First adsorption reaction        |               |                | K               | 1.893     | k <sub>2</sub>  | 5.796 |
|                                  |               |                | q <sub>e</sub>  | 0.947     | q <sub>e2</sub> | 0.97  |
|                                  |               |                | r <sup>2</sup>  | 0.996     | r <sup>2</sup>  | 0.952 |
| Second adsorption reaction       |               |                | K               | 2.448     | k <sub>2</sub>  | 7.72  |
|                                  |               |                | q <sub>e</sub>  | 0.885     | q <sub>e2</sub> | 1.021 |
|                                  |               |                | r <sup>2</sup>  | 0.985     | r <sup>2</sup>  | 0.999 |

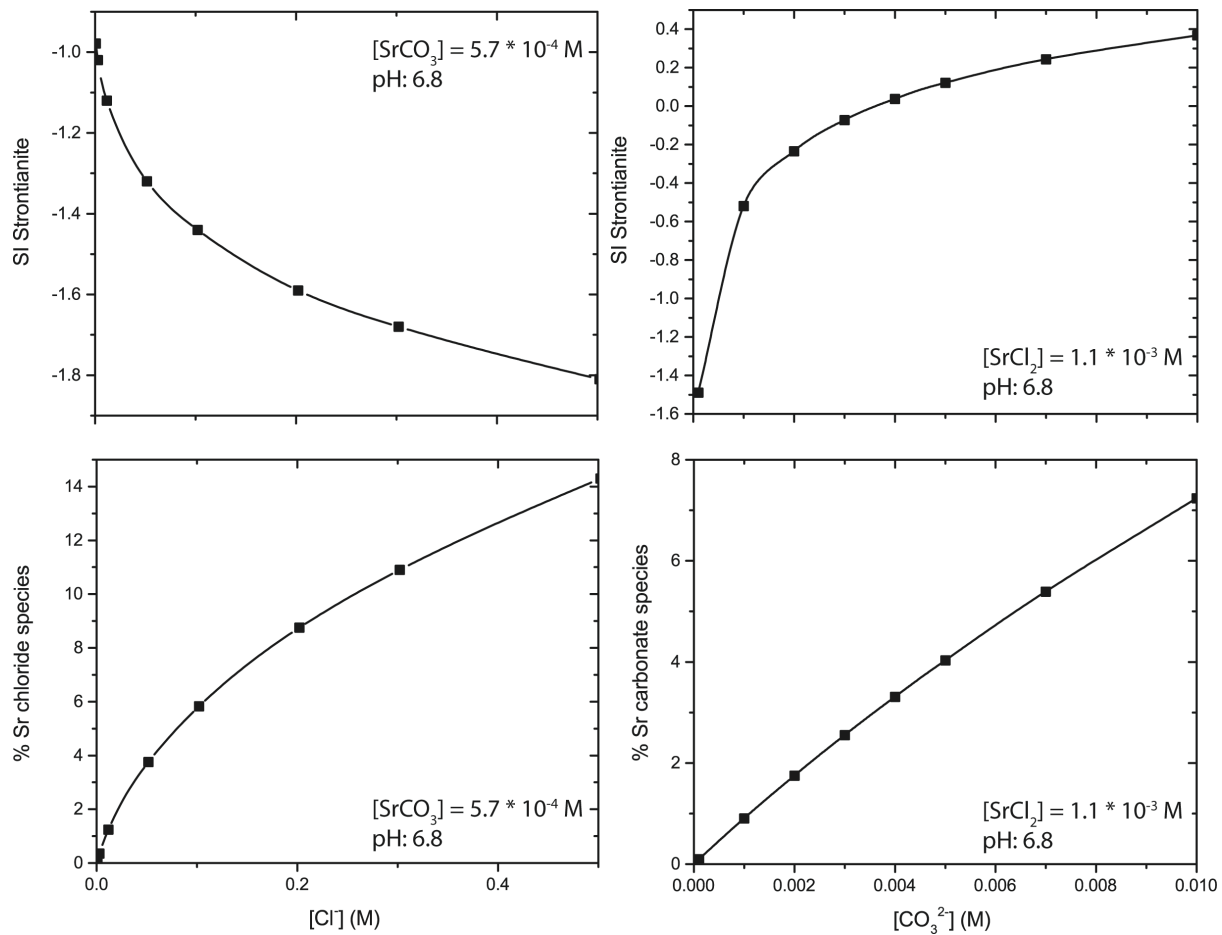

Figure S2. Sr species modeling using PHREEQC (SIT database). Left top, saturation indices of strontianite ( $\text{SrCO}_3$ ) versus  $[\text{Cl}^-]$ . Right top, saturation indices of strontianite versus  $[\text{CO}_3^{2-}]$ . Left bottom, percentage  $\text{SrCl}^+$  species of total  $\text{Sr}^{2+}$  versus  $[\text{Cl}^-]$ , and right bottom, percentage Sr-carbonate species (predominantly  $\text{SrHCO}_3^+$ ) of total  $\text{Sr}^{2+}$  versus  $[\text{CO}_3^{2-}]$ .

Table S3. X-ray reflectivity fitting results of adsorbed Sr on rutile(110)

| Sample                                        | Layer                                  | Thickness |      | Roughness |      | Density               |       | $\chi^2$ |
|-----------------------------------------------|----------------------------------------|-----------|------|-----------|------|-----------------------|-------|----------|
|                                               |                                        | (Å)       | (±)  | (Å)       | (±)  | (g cm <sup>-3</sup> ) | (±)   |          |
| Unreacted Rutile                              | Water                                  | 13.80     | 1.85 | 2.88      | 2.55 | 0.948                 | 0.179 | 3.75E-04 |
|                                               | Rutile Surface                         |           |      | 2.09      | 0.93 |                       |       |          |
| Ex-Situ Reacted Rutile with SrCl <sub>2</sub> | SrCl <sub>2</sub> 2H <sub>2</sub> O Am | 17.07     | 3.14 | 1.40      | 0.77 | 2.120                 | 0.084 | 8.27E-04 |
|                                               | Rutile                                 |           |      | 3.12      | 1.44 |                       |       |          |
| In-Situ Reacted Rutile with SrCl <sub>2</sub> | SrCl <sub>2</sub> 2H <sub>2</sub> O Am | 20.69     | 0.44 | 1.46      | 0.32 | 3.065                 | 0.048 | 5.16E-04 |
|                                               | Rutile Surface                         |           |      | 3.95      | 0.66 |                       |       |          |
| Ex-Situ Reacted Rutile with SrCO <sub>3</sub> | SrCO <sub>3</sub>                      | 14.49     | 2.57 | 3.02      | 0.87 | 3.135                 | 0.184 | 9.05E-04 |
|                                               | Rutile surface                         |           |      | 2.60      | 1.79 |                       |       |          |

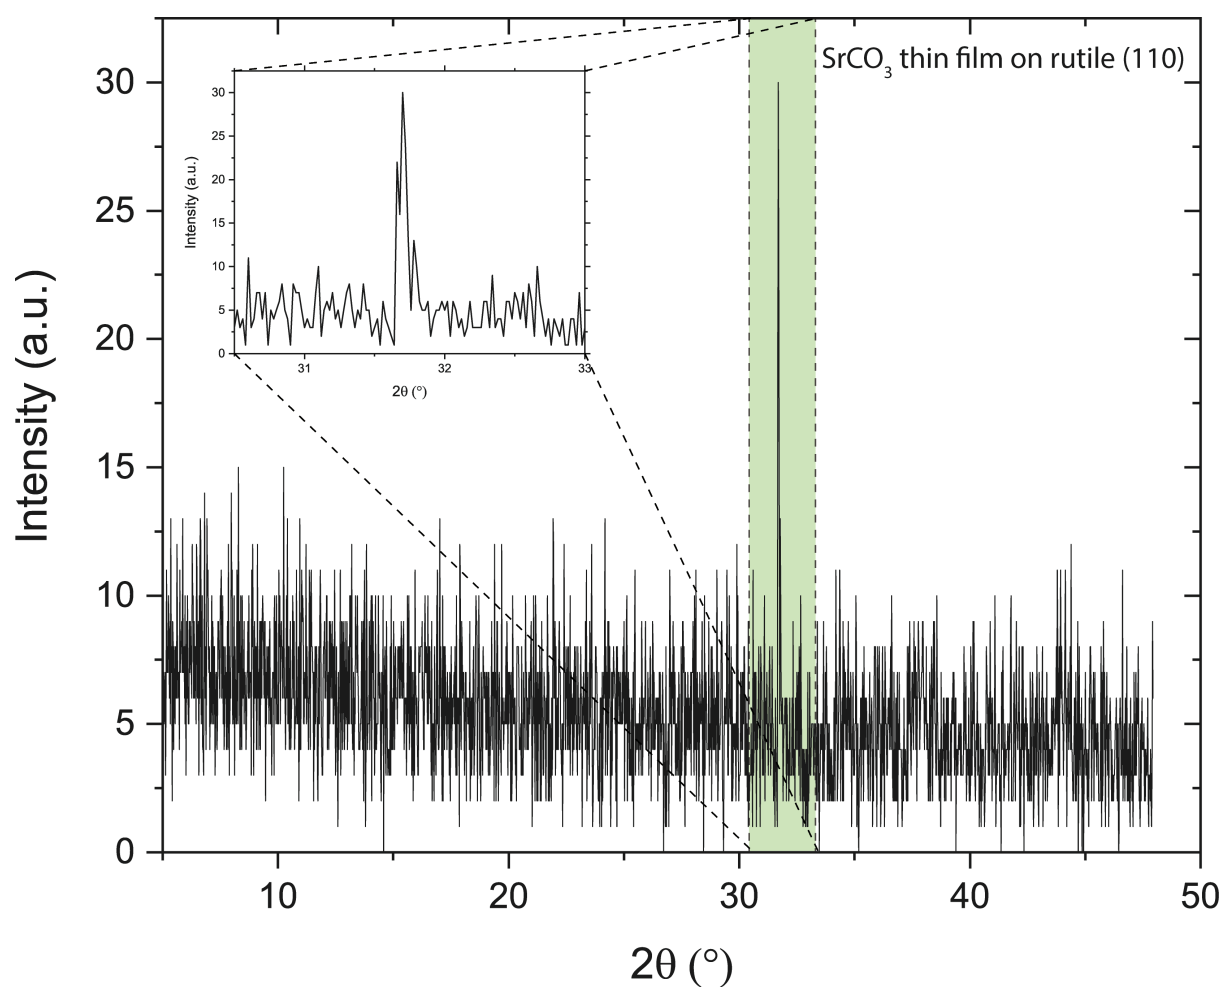

Figure S3. Grazing incidence XRD pattern of SrCO<sub>3</sub> adsorbed to the rutile(110) surface. The sharp and thin FWHM of the Bragg peak indicates that this is a rather organized surface precipitate with a d-spacing of 2.823 Å.

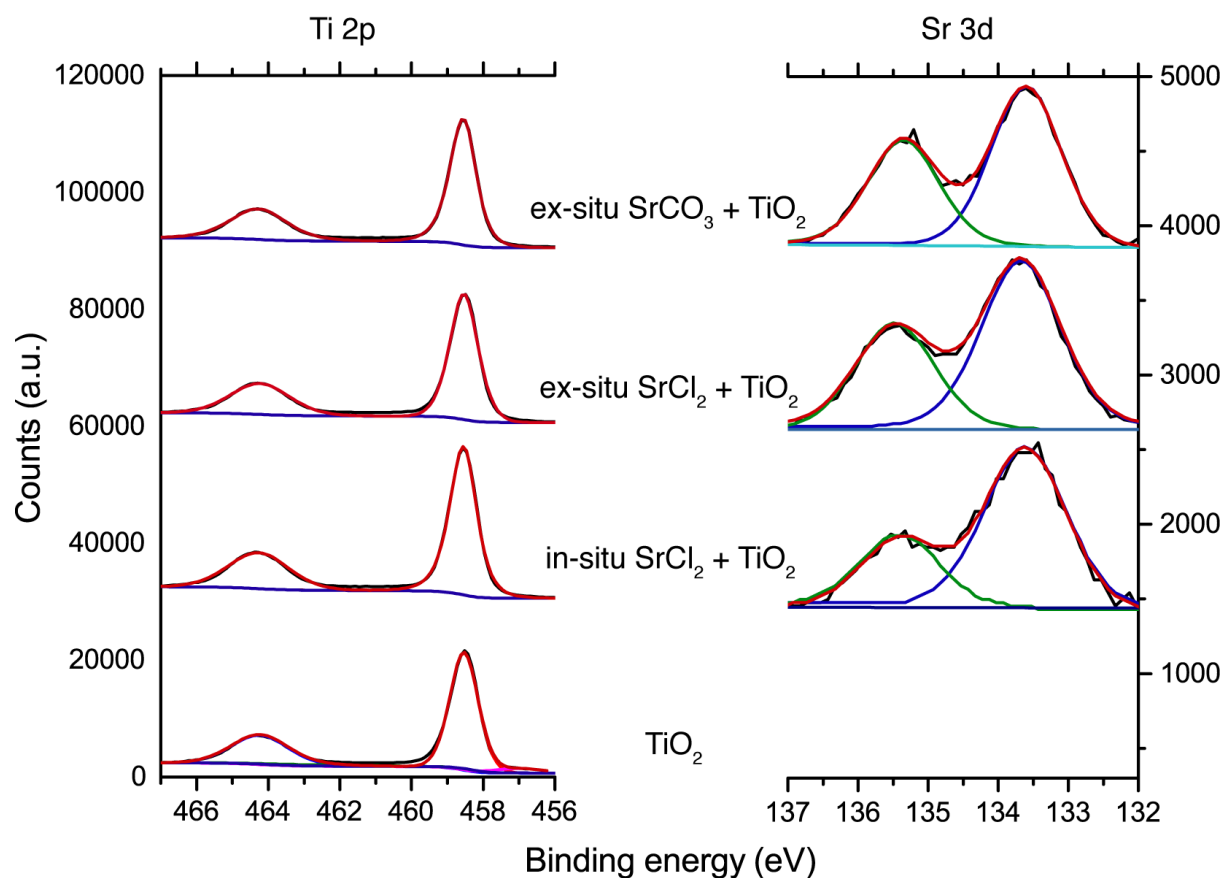

Figure S4. Ti 2p and Sr 3d measured XPS spectra. X-ray source was an Al K $\alpha$  set at 1486.7 eV with pass energy of 20 eV and chamber pressure of  $3 - 4 \times 10^{-9}$  bar. The spectra were calibrated using the C 1s peak of adventitious carbon, defined at 284.8 eV.

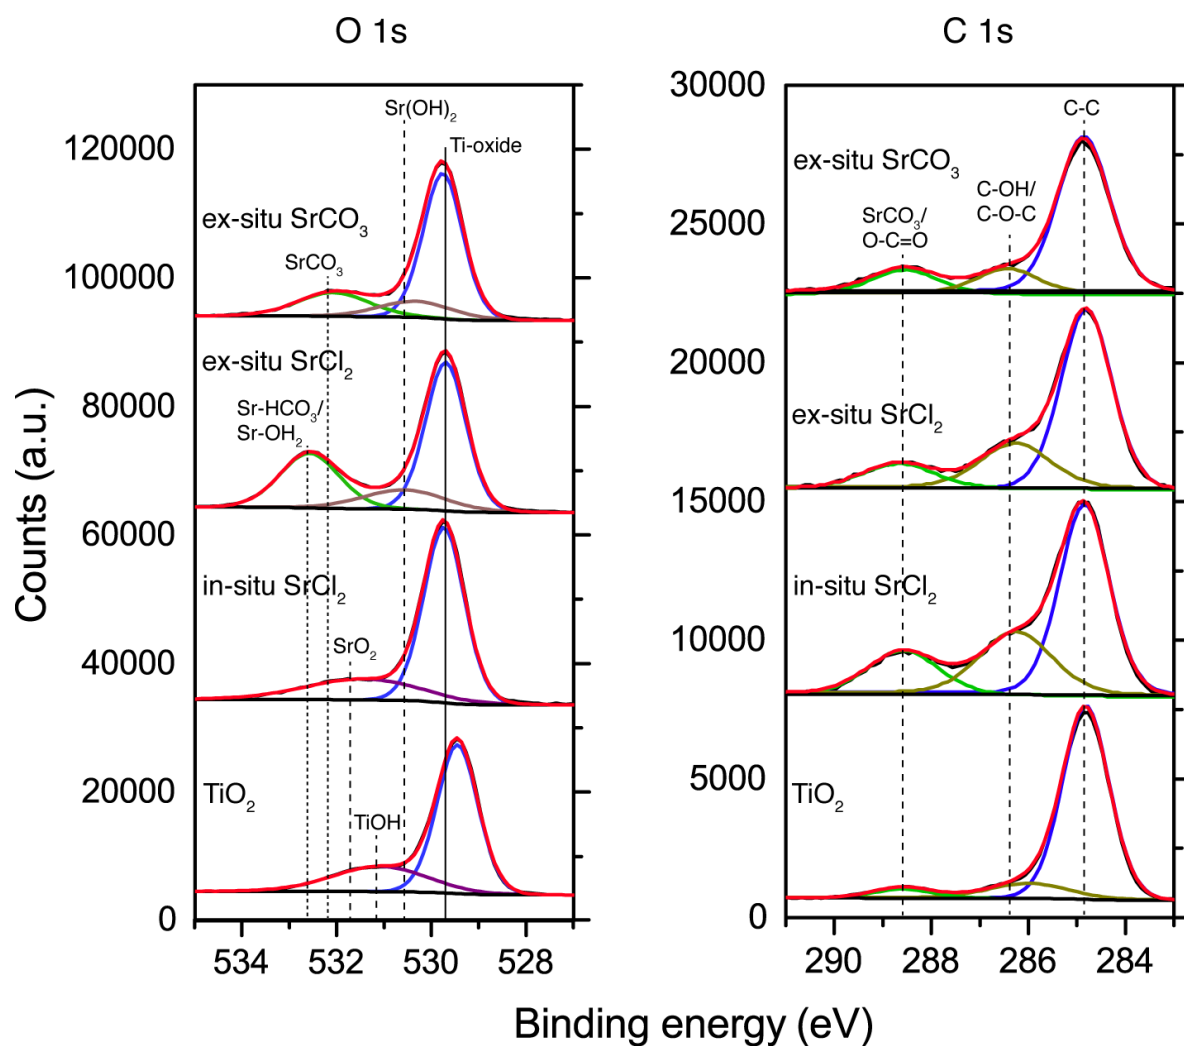

Figure S5. O 1s and C 1s measured XPS spectra. X-ray source was an Al  $K\alpha$  set at 1486.7 eV with pass energy of 20 eV and chamber pressure of  $3 - 4 \times 10^{-9}$  bar. The spectra were calibrated using the C 1s peak of adventitious carbon, defined at 284.8 eV.

Table S4. XPS fitting results of Sr, O, Ti and C under the four conditions.

|                                            | Sr 3d    | BE* (eV) | Δ BE | O 1s                                               | BE (eV) | % <sup>s</sup> | Ti 2p    | BE (eV) | Δ BE | C 1s                    | BE (eV) | %    |
|--------------------------------------------|----------|----------|------|----------------------------------------------------|---------|----------------|----------|---------|------|-------------------------|---------|------|
| TiO <sub>2</sub> (110) unreacted           |          |          |      | lattice oxide                                      | 529.45  | 71.9           | 2p (3/2) | 458.27  |      | C-C                     | 284.81  | 81.9 |
|                                            |          |          |      | hydrated                                           | 531.09  | 28.1           | 2p (1/2) | 463.98  | 5.71 | C-O-C/C-O               | 285.99  | 12.1 |
|                                            |          |          |      | Residual                                           | 4.80    |                | Residual | 23.91   |      | O-C=O                   | 288.59  | 6.0  |
|                                            |          |          |      |                                                    |         |                |          |         |      | Residual                | 2.06    |      |
| TiO <sub>2</sub> (110) + SrCO <sub>3</sub> | 3d (5/2) | 133.60   |      | lattice oxide                                      | 529.76  | 66.5           | 2p (3/2) | 458.57  |      | C-C                     | 284.86  | 73.3 |
|                                            | 3d (3/2) | 135.35   | 1.75 | Sr(OH) <sub>2</sub>                                | 530.33  | 13.9           | 2p (1/2) | 464.29  | 5.72 | C-O-C/Sr-C-O            | 286.44  | 12.2 |
|                                            | Residual | 0.89     |      | SrCO <sub>3</sub>                                  | 532.08  | 19.7           | Residual | 8.34    |      | O-C=O/SrCO <sub>3</sub> | 288.54  | 14.5 |
|                                            |          |          |      | Residual                                           | 1.56    |                |          |         |      | Residual                | 0.86    |      |
| TiO <sub>2</sub> (110) + SrCl <sub>2</sub> | 3d (5/2) | 133.61   |      | lattice oxide                                      | 529.74  | 75.0           | 2p (3/2) | 458.55  |      | C-C                     | 284.84  | 56.3 |
|                                            | 3d (3/2) | 135.41   | 1.8  | SrO <sub>2</sub>                                   | 531.46  | 25.0           | 2p (1/2) | 464.27  | 5.72 | C-O-C/Sr-C-O            | 286.26  | 25.5 |
|                                            | Residual | 0.76     |      | Residual                                           | 1.94    |                | Residual | 7.35    |      | O-C=O/SrCO <sub>3</sub> | 288.58  | 18.2 |
|                                            |          |          |      |                                                    |         |                |          |         |      | Residual                | 1.00    |      |
| ex-situ SrCl <sub>2</sub>                  | 3d (5/2) | 133.69   |      | lattice oxide                                      | 529.70  | 55.4           | 2p (3/2) | 458.54  |      | C-C                     | 284.80  | 64.1 |
|                                            | 3d (3/2) | 135.49   | 1.8  | Sr(OH) <sub>2</sub>                                | 530.58  | 14.9           | 2p (1/2) | 464.24  | 5.71 | C-O-C/Sr-C-O            | 286.27  | 22.9 |
|                                            | Residual | 0.85     |      | SrCO <sub>3</sub> /SrHCO <sub>3</sub> <sup>-</sup> | 532.58  | 29.8           | Residual | 14.51   |      | O-C=O/SrCO <sub>3</sub> | 288.67  | 13.0 |
|                                            |          |          |      | Residual                                           | 2.58    |                |          |         |      | Residual                | 1.10    |      |

\* BE—Binding energy (eV), <sup>s</sup> %—percentage of species of the total measured elemental spectrum

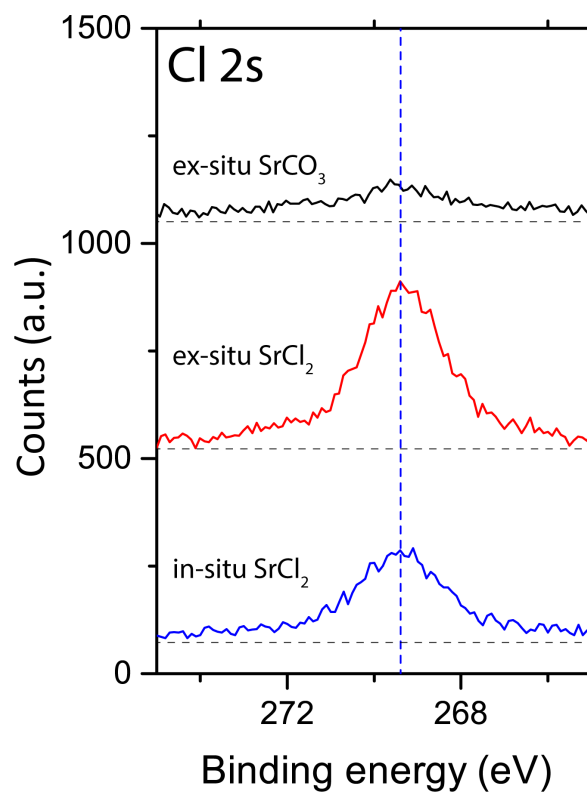

Figure S6. Cl 2s measured XPS spectra. Instruments settings are the same as for figure S3 and S4.

## SS1. EXAFS fitting routine Sr EXAFS

Table S5. Extracted path lengths from crystallographic data from the literature.

| Shell | CN                                                        | R      | CN                                    | R     | CN                                                  | R     | CN                                                  | R     |
|-------|-----------------------------------------------------------|--------|---------------------------------------|-------|-----------------------------------------------------|-------|-----------------------------------------------------|-------|
|       | <i>SrCO<sub>3</sub> (aragonite structure)<sup>1</sup></i> |        | <i>Sr(OH)<sub>2</sub><sup>2</sup></i> |       | <i>SrCl<sub>2</sub>·6H<sub>2</sub>O<sup>3</sup></i> |       | <i>SrCl<sub>2</sub>·4H<sub>2</sub>O<sup>4</sup></i> |       |
| Sr-O  | 1                                                         | 2.5647 | 1                                     | 2.495 | 3                                                   | 2.562 | 1                                                   | 2.561 |
| Sr-O  | 2                                                         | 2.5780 | 2                                     | 2.554 | 6                                                   | 2.709 | 1                                                   | 2.642 |
| Sr-O  | 2                                                         | 2.6401 | 2                                     | 2.578 |                                                     |       | 1                                                   | 2.669 |
| Sr-O  | 2                                                         | 2.6515 | 1                                     | 2.657 |                                                     |       | 1                                                   | 2.673 |
| Sr-O  | 2                                                         | 2.7298 | 1                                     | 2.768 |                                                     |       | 1                                                   | 2.677 |
| Sr-O  |                                                           |        |                                       |       |                                                     |       | 1                                                   | 2.685 |
| Sr-O  |                                                           |        |                                       |       |                                                     |       | 1                                                   | 2.692 |
| Sr-O  |                                                           |        |                                       |       |                                                     |       | 1                                                   | 2.707 |
| Sr-O  |                                                           |        |                                       |       |                                                     |       | 1                                                   | 2.712 |

From the table it can be observed that in virtually any Sr bearing mineral the Sr-O varies a lot. Some less than others. Variation from ~0.08 – 0.1 is significant and can be easily captured with EXAFS. Distances less than 0.02 are likely not significant to be fitted accurately, and therefore combined. For that we will need much better data, and probably collected at a temperature where the Debye-Waller curve is plateaued out (usually around 60-80 K) and even then, this will probably be difficult, especially when there are many varying Sr-O distances. However, we need to state here that this discussion is about **crystalline phases, with crystallographic ordering**. Since we are dealing with thin films, the coordination environment is likely to be different, but we would not expect all oxygen distances to be identical in the first shell.

From this basis we started fitting our samples. Each sample condition was different enough to expect subtle differences in speciation. For our fitting model we also used chemical reasonableness, in other words if it makes sense. For example, in our *ex situ* system which was dried we observed a XANES spectrum that has similarities with our SrCl<sub>2</sub>·6H<sub>2</sub>O spectrum. Therefore, it is reasonable to assume that Cl might be in the structure.

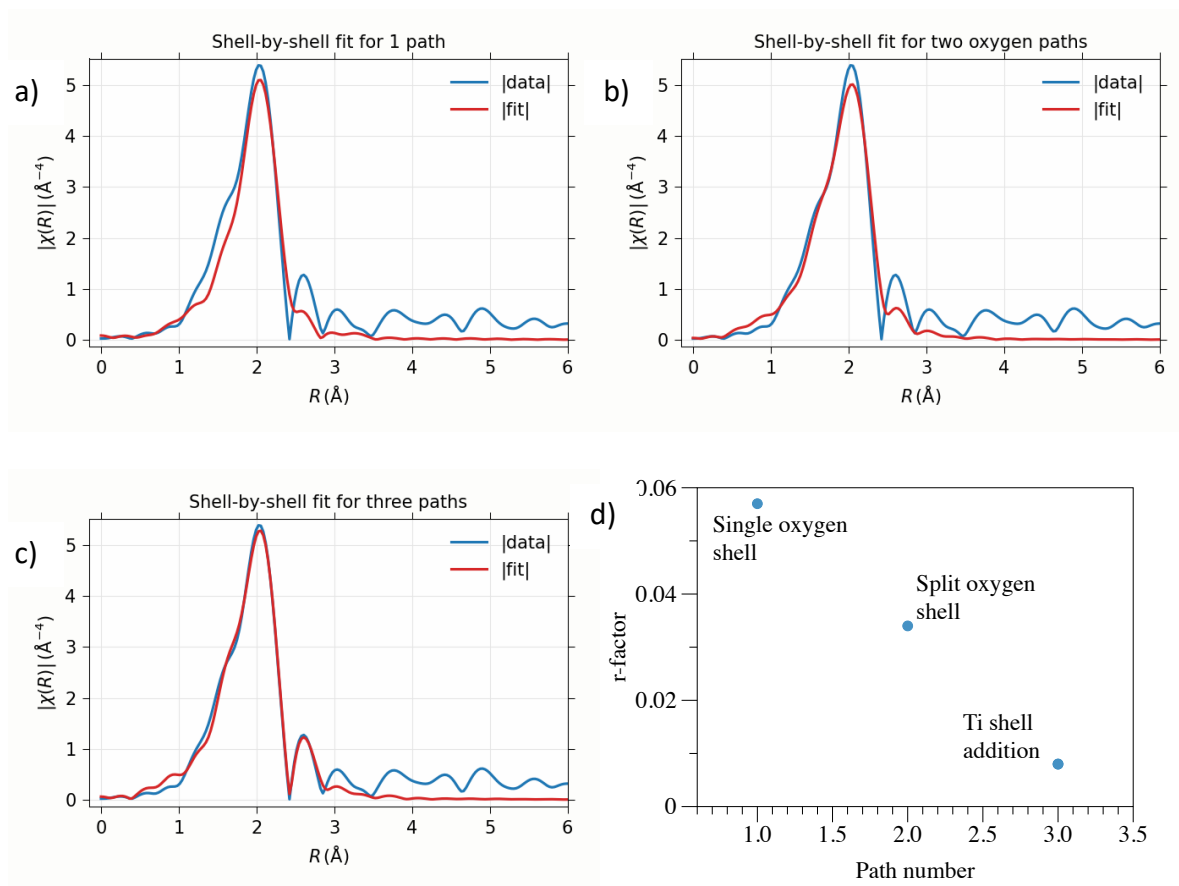

Figure S7. Fitting routine of a) one shell with oxygen atoms, which clearly shows that one shell is not sufficient, b) same fit, but applying a split shell of oxygen atoms. The addition of a Ti shell in c) improved the fit even further. Figure 1d shows how the fitting quality improved adding the shells in a-c.

Figure 1a shows the fitting routine of 9 oxygen atoms in the first shell. We obtained results and can see that there is a parameter missing. We applied the split shell and kept the number of oxygen atoms the same, but split over two shells (Figure 1b). Our fit improved. Then we fitted Ti, and our fit drastically improved (Figure 1c). We also did a fit where we included Ti and one shell of oxygen atoms, but the fit was significantly worse.

## SS2. Polarization dependence *ex situ* SrCO<sub>3</sub>

To go into detail about the fit, we first need to understand the sample. In this particular sample we found a surface precipitate that was characterized as a thin film of SrCO<sub>3</sub> polymerized on the crystal surface. Our GI-XRD results gave a heavy textured diffraction pattern, suggesting an oriented periodic film. When comparing the EXAFS of SrCO<sub>3</sub> and the *ex situ* SrCO<sub>3</sub>, we can observe an increase in amplitude between  $k$  6 – 9 Å<sup>-1</sup>. The likely reason for this can be explained by some form of an organized layer that as a result will create a polarization dependency. This is typically characterized by an increase and decrease in EXAFS amplitudes when more or less aligned or perpendicular to the polarization vector  $\epsilon$ . For full details, we would like to refer you to van Veelen et al., (2016)<sup>9</sup>, and Hudson et al., (1996)<sup>12</sup>.

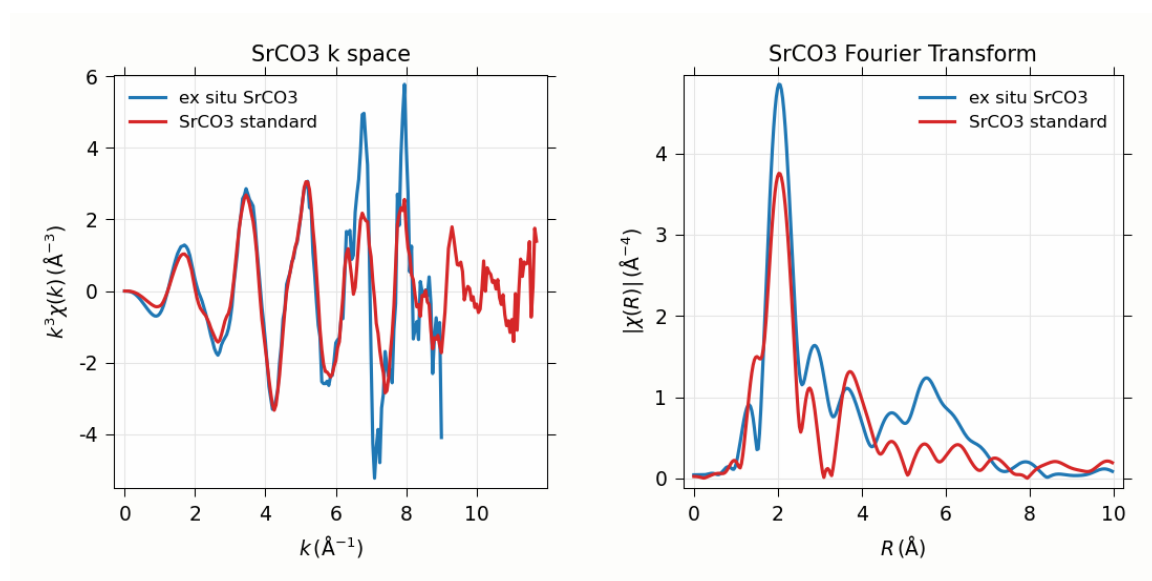

Figure S8. Comparison of powdered SrCO<sub>3</sub> standard prepared for fluorescence measurements, and a SrCO<sub>3</sub> adsorbate on rutile(110).

Table S6. Fitting parameters of *ex situ* SrCO<sub>3</sub>

| Shell                                                                            | CN  | R        | $\sigma$   | $S_0^2$      | r-factor |
|----------------------------------------------------------------------------------|-----|----------|------------|--------------|----------|
| <i>One shell of oxygen – uncorrected</i>                                         |     |          |            |              |          |
| Sr-O                                                                             | 9   | 2.63 (2) | 0.001 (4)  | 0.48 (14)    | 0.10     |
| <i>One shell of oxygen – corrected</i>                                           |     |          |            |              |          |
| Sr-O                                                                             | 4.8 | 2.63 (3) | 0.001 (2)  | 0.91 (fixed) | 0.15     |
| <i>SrCO<sub>3</sub> fit – float <math>S_0^2</math></i>                           |     |          |            |              |          |
| Sr-O                                                                             | 9   | 2.62 (2) | -0.004 (3) | 0.40 (8)     | 0.08     |
| Sr-C                                                                             | 3.8 | 2.92 (4) | -0.009 (4) |              |          |
| <i>SrCO<sub>3</sub> fit – fix <math>S_0^2</math> to earlier determined value</i> |     |          |            |              |          |
| Sr-O                                                                             | 9   | 2.66 (3) | 0.002 (3)  | 0.91 (fixed) | 0.034    |
| Sr-C                                                                             | 3.8 | 3.07 (4) | 0.006 (8)  |              |          |
| <i>SrCO<sub>3</sub> fit – fitted <math>S_0^2</math> to</i>                       |     |          |            |              |          |
| Sr-O                                                                             | 9   | 2.66 (3) | 0.010 (1)  | 1.08         | 0.021    |
| Sr-C                                                                             | 6   | 3.09 (3) | 0.007 (5)  |              |          |

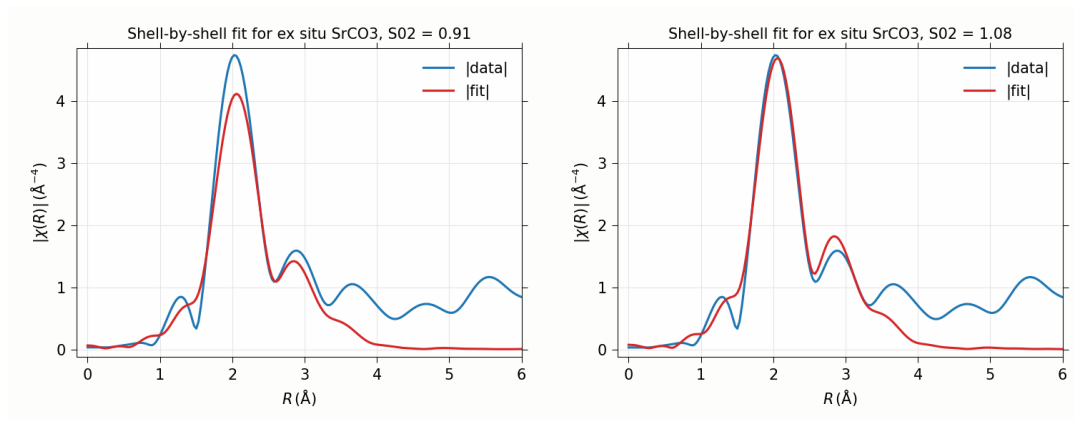

Figure S9. Comparison of *ex situ* SrCO<sub>3</sub> sample with selecting  $S_0^2$  determined from the SrCO<sub>3</sub> and optimized for a better fit.

By looking at the fits, we can observe that CN number is severely under estimated, due to the polarization dependence. Keeping the coordination reasonable, means that the  $S_0^2$  goes up too.

#### Further reading:

van Veelen, A., et al. (2016). "Uranium Immobilization and Nanofilm Formation on Magnesium-Rich Minerals." *Environmental Science & Technology* **50**(7): 3435-3443.

Hudson, E. A., et al. (1996). "Polarized x-ray-absorption spectroscopy of the uranyl ion: Comparison of experiment and theory." *Physical Review B* **54**(1): 156-165.
